# Supplementary material for: Multidisciplinary Approaches for Assessing a High Temperature Borehole Thermal Energy Storage Facility at Linköping, Sweden
Source: MDPI journal article supplement (doi:10.3390/en14144379), 2021-07-20
Supplement: s1 [file s1]

**Table S1.** Supplementary information on the equipment used for the various methods.

| Method                                      | Description of equipment                                                                                                                                                                                                                                                                                                                                                                                      | Comments on method uncertainty                                                                                                                                                                                                                                                                                                                                                                                                                                                              |
|---------------------------------------------|---------------------------------------------------------------------------------------------------------------------------------------------------------------------------------------------------------------------------------------------------------------------------------------------------------------------------------------------------------------------------------------------------------------|---------------------------------------------------------------------------------------------------------------------------------------------------------------------------------------------------------------------------------------------------------------------------------------------------------------------------------------------------------------------------------------------------------------------------------------------------------------------------------------------|
| Magnetic measurements                       | GEM GSMV-19                                                                                                                                                                                                                                                                                                                                                                                                   | Absolute accuracy of instrument is of the order of $\pm 0.1$ nT ( <a href="http://www.gemsys.ca/pdf/GSM-19-Overhauser.pdf">http://www.gemsys.ca/pdf/GSM-19-Overhauser.pdf</a> ). However, at the Linköping site, uncertainty in the measurements is likely to be larger due to survey noise. This could include the effect of manmade metallic objects which has not been fully removed from the data or inaccuracies in the diurnal correction etc.                                        |
| Ground VLF measurements                     | GEM GSMV-19                                                                                                                                                                                                                                                                                                                                                                                                   | Instrument resolution of 0.1% of the total field ( <a href="http://www.gemsys.ca/pdf/GSM-19-Overhauser.pdf">http://www.gemsys.ca/pdf/GSM-19-Overhauser.pdf</a> ). Efforts were made to remove noise from the data due to manmade sources (such as power lines, electric fences, and metallic objects). However, in places the uncertainty will be larger in the data because of these noise sources.                                                                                        |
| Ground magnetic susceptibility measurements | SM-20 susceptibility meter                                                                                                                                                                                                                                                                                                                                                                                    | Sensitivity of $10^{-6}$ SI units. To obtain a representative measurement, at least 10 measurements were made at different points on each outcrop location where susceptibility was measured.<br>( <a href="http://www.gfstruments.cz/index.php?menu=gi&amp;cont=sm_ov">http://www.gfstruments.cz/index.php?menu=gi&amp;cont=sm_ov</a> )                                                                                                                                                    |
| Ground gamma ray spectrometer measurements  | RS-125/230                                                                                                                                                                                                                                                                                                                                                                                                    | Measurements taken using the ASSAY mode with a measurement interval of 300s. Three measurements were made on different parts of the outcrop, when making measurements. Instrument calibrated on a yearly basis. For further details on accuracy and uncertainty see ( <a href="https://www.aseg.org.au/sites/default/files/RS-125%20RS-230_User_Manual%20%28GR%29.pdf">https://www.aseg.org.au/sites/default/files/RS-125%20RS-230_User_Manual%20%28GR%29.pdf</a> )                         |
| Lab Thermal conductivity measurements       | Thermal conductivity scanner (Lippmann and Rauen GbR)                                                                                                                                                                                                                                                                                                                                                         | Accuracy of thermal conductivity measurements (3%). Accuracy of thermal diffusivity measurements (5%). For more information see ( <a href="http://www.geophysik-dr-rauen.de/tcscan/">http://www.geophysik-dr-rauen.de/tcscan/</a> )                                                                                                                                                                                                                                                         |
| Lab magnetic susceptibility measurements    | GTK K4/GSF-93                                                                                                                                                                                                                                                                                                                                                                                                 | standard deviation of measurements about 5 kg/m <sup>3</sup>                                                                                                                                                                                                                                                                                                                                                                                                                                |
| Lab density measurements                    | Water and precision scale (FX-3200)                                                                                                                                                                                                                                                                                                                                                                           | standard deviation of measurements about $20 \times 10^{-6}$ SI                                                                                                                                                                                                                                                                                                                                                                                                                             |
| Drone photography                           | Mavic 2 pro                                                                                                                                                                                                                                                                                                                                                                                                   | 20-megapixel hasselblad camera used to capture images. Accuracy of GPS positioning during flight $\pm$ about 5m. Positions of orthographic images were re-positioned in GIS software after generation, if required.                                                                                                                                                                                                                                                                         |
| Wireline logging                            | <u>Probes and data acquisition systems manufactured by Robertsson Geologging</u><br><u>Focused electric /guard log) probe</u><br>Specification:<br>Diameter: 42 mm<br>Length: 2.82 m<br>Weight: 8 kg<br>Max. temperature: 70 °C<br>Max. pressure: 3000 psi / 20 MPa<br>Guard Log sense electrode: 10 cms<br>Guard electrodes: 2 x 1 m<br>Current drive: 200 Hz bi-directional<br>Current return: Cable armour | The uncertainty of the geophysical logs is essentially related to the borehole conditions. Significantly larger borehole diameter will render a suppressed and smoothened signal for most logs.<br>The resolution is also affected by the logging speed.<br><br>The resolution of the Caliper log is $\pm$ 6mm.<br><br>The Linköping boreholes did not show any significant poor borehole condition that decreases the quality according to the prerequisites given for the various probes. |

|                                                         |                                                                                                                                                                                                                                                                                                                                                                                                                                                                                                                                                                                                                                                                                                                                                                                                                                                                                                                                                                                                                                                                                                                                                                                                                                                                                                                                                                                                                                               |                                                                                                                                                                                                                                                                                                                                                                                                                                                                                                                                                                                                                                                                                                                                      |
|---------------------------------------------------------|-----------------------------------------------------------------------------------------------------------------------------------------------------------------------------------------------------------------------------------------------------------------------------------------------------------------------------------------------------------------------------------------------------------------------------------------------------------------------------------------------------------------------------------------------------------------------------------------------------------------------------------------------------------------------------------------------------------------------------------------------------------------------------------------------------------------------------------------------------------------------------------------------------------------------------------------------------------------------------------------------------------------------------------------------------------------------------------------------------------------------------------------------------------------------------------------------------------------------------------------------------------------------------------------------------------------------------------------------------------------------------------------------------------------------------------------------|--------------------------------------------------------------------------------------------------------------------------------------------------------------------------------------------------------------------------------------------------------------------------------------------------------------------------------------------------------------------------------------------------------------------------------------------------------------------------------------------------------------------------------------------------------------------------------------------------------------------------------------------------------------------------------------------------------------------------------------|
|                                                         | <p>Voltage reference: Surface earth stake (fish)</p> <p>Measurement range: 1 to 10,000 ohm-m</p> <p>Natural-gamma detector: 50 mm x 25 mm</p> <p>NaI(Tl) scintillation crystal</p> <p><u>3-arm Caliper with Natural Gamma ray</u></p> <p>Specification:</p> <p>Diameter: 38 mm</p> <p>Length: 2.39 m (two sections)</p> <p>Weight: 9.2 kg</p> <p>Range: 40-300 mm/1.6-12" (40-710mm/1.6-28" with extension arms)</p> <p>Max. temperature: 70 °C</p> <p>Max. pressure: 3000 psi / 20MPa</p> <p>Accuracy: +/-6mm</p> <p>Natural-gamma detector: 50 mm x 25 mm NaI (Tl) scintillation crystal</p> <p><u>Electrical log probe</u></p> <ul style="list-style-type: none"> <li>• <u>16" Normal Resistivity</u></li> <li>• <u>64" Normal Resistivity</u></li> <li>• <u>Single Point Resistivity</u></li> <li>• <u>Self Potential</u></li> <li>• <u>Natural Gamma</u></li> <li>• <u>Temperature</u></li> </ul> <p>Specification:</p> <p>Diameter: 44mm</p> <p>Length: 2775 mm</p> <p>Weight: 11 kg</p> <p>Temperature Rating: 125 °C</p> <p>Max Pressure Rating: 5000 psi</p> <p><u>Borehole Acoustic Televue probe</u></p> <p>Specification:</p> <p>Sonde Diameter 42mm</p> <p>Length: 1.62m (2.06m with natural-gamma option)</p> <p>Transducer type: 1.5MHz piezo-composite</p> <p>Rotation rate: 5 – 20rev/s</p> <p>Sample rate: up to 360/rev Length: 1.62 m</p> <p>Weight:</p> <p>Temperature Rating 70c</p> <p>Max Pressure Rating - 20Mpa</p> | <p>Repeated sections were run to check that the values are repetitive</p>                                                                                                                                                                                                                                                                                                                                                                                                                                                                                                                                                                                                                                                            |
| Distributed temperature measurements with optical fiber | <p><u>Logger:</u></p> <p>Type: HALO DTS, 2 channels</p> <p>Manufacturer: Sensornet</p> <p><a href="https://www.sensornet.co.uk/wp-content/uploads/2020/07/Halo-DTS-data-sheet-v3.pdf">https://www.sensornet.co.uk/wp-content/uploads/2020/07/Halo-DTS-data-sheet-v3.pdf</a></p> <p><u>Cable:</u></p> <p>Type: Brussels MMF 50/125 4F LLK-BSTE 85°C 3.8 mm (i.e. a fiber optic cable, type 50/125, having four graded index multimode fibers protected by a thin stainless tube with an outside diameter of 3.8 mm)</p>                                                                                                                                                                                                                                                                                                                                                                                                                                                                                                                                                                                                                                                                                                                                                                                                                                                                                                                        | <p>The uncertainty of this type is installation dependent and depends on aspects such as integration time, integration length as well as location of the cable section to be measured. Other systematic aspects such as presence of fiber splices (welding points) are also of influence. So called single ended (the laser pulses are sent in one direction along the fiber) measurements and calibration with the help of external reference points were performed in the tests presented in this paper. More about this type of calibration can be found in:</p> <p><i>Hausner, M.B.; Suárez, F.; Glander, K.E.; Giesen, N.v.d.; Selker, J.S.; Tyler, S.W. Calibrating Single-Ended Fiber-Optic Raman Spectra Distributed</i></p> |

|      |                                                                                                                                                                                                                                                                                                                                                                                                                                                  |                                                                                                                                                                                                                                                                                                                                                                                                                                                                                                                                                                                                                                                                                                                                                                                                                                                                                                                                                                                                                                                                                                                                                                                                                                                                                                                                                                                                                                                                                                                                   |
|------|--------------------------------------------------------------------------------------------------------------------------------------------------------------------------------------------------------------------------------------------------------------------------------------------------------------------------------------------------------------------------------------------------------------------------------------------------|-----------------------------------------------------------------------------------------------------------------------------------------------------------------------------------------------------------------------------------------------------------------------------------------------------------------------------------------------------------------------------------------------------------------------------------------------------------------------------------------------------------------------------------------------------------------------------------------------------------------------------------------------------------------------------------------------------------------------------------------------------------------------------------------------------------------------------------------------------------------------------------------------------------------------------------------------------------------------------------------------------------------------------------------------------------------------------------------------------------------------------------------------------------------------------------------------------------------------------------------------------------------------------------------------------------------------------------------------------------------------------------------------------------------------------------------------------------------------------------------------------------------------------------|
|      |                                                                                                                                                                                                                                                                                                                                                                                                                                                  | <p><i>Temperature Sensing Data. Sensors 2011, 11, 10859-10879. <a href="https://doi.org/10.3390/s111110859">https://doi.org/10.3390/s111110859</a></i></p> <p>For this specific test, the authors estimate an absolute temperature uncertainty of <math>\pm 0.5</math> K</p>                                                                                                                                                                                                                                                                                                                                                                                                                                                                                                                                                                                                                                                                                                                                                                                                                                                                                                                                                                                                                                                                                                                                                                                                                                                      |
| DTRT | <p>Besides the DTS equipment described in the row above in this table, in situ thermal conductivity tests have used a mechanical (propeller) flow meter of type LTFM-15-304-P-D-T and PT1000 temperature sensors. A complete documentation of each of these can be found in section 4.1 in <a href="http://kth.diva-portal.org/smash/get/diva2:1197907/FULLTEXT01.pdf">http://kth.diva-portal.org/smash/get/diva2:1197907/FULLTEXT01.pdf</a></p> | <p>Thermal conductivity in each borehole section. The temperature difference between the fluid and the undisturbed ground was calculated as a function of time using the infinite line source model. The squared error between calculated and measured values is minimized by the value of thermal conductivity and borehole resistance, at each depth. The calculations were conducted using the temperature measurement along the downward flow shank of the borehole heat exchanger, which limits the possibility of measuring with accuracy the injected power at each section.</p> <p>An accurate uncertainty analysis has not been done in this case, but the thermal conductivity measurement uncertainty is from experience estimated to range between 5-15%.</p> <p>Full description of the DTRT method used in this type of work where more insights into measurement errors are given can be found at:</p> <p>(Acuna, 2013) <a href="http://kth.diva-portal.org/smash/get/diva2:602905/FULLTEXT01.pdf">http://kth.diva-portal.org/smash/get/diva2:602905/FULLTEXT01.pdf</a></p> <p>(Witte, 2012) <a href="http://www.groenholland.nl/download/INNOS-U08_TRTERROR_FULL.pdf">http://www.groenholland.nl/download/INNOS-U08 TRTERROR FULL.pdf</a> )</p> <p>(IEA ECES ANNEX 21 Thermal Response Test FINAL REPORT, November 2013 <a href="https://iea-ec.es.org/wp-content/uploads/public/IEA_ECES_ANNEX_21_FINAL_REPORT.pdf">https://iea-ec.es.org/wp-content/uploads/public/IEA_ECES_ANNEX_21_FINAL_REPORT.pdf</a> )</p> |

**Table S2.** Mean, minimum and maximum values for each of the lab based TCS measurements performed on samples from the Distorp area. The sampling locations are given in the SWEREF99 TM coordinate system.

| Observation ID | Measurement | Rock type | TC (W/mK) |       |       | Position (SWEREF99 TM) |         |
|----------------|-------------|-----------|-----------|-------|-------|------------------------|---------|
|                |             |           | mean      | min   | max   | X (m)                  | Y (m)   |
| DSR200001A     | 1           | Granite   | 3.668     | 3.182 | 4.407 | 539672                 | 6479045 |
| DSR200001A     | 2           | Granite   | 3.583     | 3.124 | 4.372 | 539672                 | 6479045 |
| DSR200003A     | 1           | Granite   | 3.405     | 2.752 | 4.121 | 539722                 | 6478327 |
| DSR200003A     | 2           | Granite   | 3.338     | 2.742 | 3.928 | 539722                 | 6478327 |
| DSR200007A     | 1           | Granite   | 2.401     | 2.101 | 2.658 | 537100                 | 6479320 |
| DSR200007A     | 2           | Granite   | 2.441     | 2.284 | 2.639 | 537100                 | 6479320 |
| DSR200008A     | 1           | Granite   | 2.483     | 2.228 | 2.745 | 537002                 | 6479953 |
| DSR200008A     | 2           | Granite   | 2.54      | 2.389 | 2.691 | 537002                 | 6479953 |
| mer19002       | 1           | Granite   | 3.50      | 3.07  | 3.90  | 539726                 | 6478343 |
| mer19004       | 1           | Granite   | 3.29      | 3.06  | 3.55  | 539159                 | 6478578 |

|            |   |              |       |       |       |        |         |
|------------|---|--------------|-------|-------|-------|--------|---------|
| mer19009   | 1 | Granite      | 3.23  | 3.05  | 3.46  | 539532 | 6478573 |
| mer19015   | 1 | Granite      | 3.30  | 3.07  | 3.49  | 539666 | 6479047 |
| mer19019   | 1 | Granite      | 2.82  | 2.63  | 2.99  | 538116 | 6478717 |
| mer19021   | 1 | Granite      | 3.10  | 2.85  | 3.52  | 538340 | 6478954 |
| DSR200005A | 1 | Gabbro       | 2.233 | 2     | 2.563 | 539760 | 6478200 |
| DSR200005A | 2 | Gabbro       | 2.5   | 2.251 | 3.003 | 539760 | 6478200 |
| DSR200006B | 1 | Granodiorite | 2.283 | 2.035 | 2.653 | 538806 | 6478144 |
| DSR200006B | 2 | Granodiorite | 2.198 | 2.076 | 2.437 | 538806 | 6478144 |
| mer19001   | 1 | Gabbro       | 2.28  | 2.04  | 2.48  | 539752 | 6478191 |
| mer19003   | 1 | Gabbro       | 2.83  | 2.62  | 3.21  | 538364 | 6478397 |
| mer19020   | 1 | Gabbro       | 2.85  | 2.68  | 3.11  | 538042 | 6478733 |
| mer19022   | 1 | Gabbro       | 2.17  | 2.04  | 2.34  | 538802 | 6478150 |
| dsr191001  | 1 | Gabbro       | 2.44  | 2.18  | 2.85  | 539611 | 6477781 |

**Table S3.** Calculated thermal conductivity based on the modal analyses of the mineral composition, primarily the quartz content, on rock samples of various typical rock types within five-kilometer radius from the Distorp site. (Data from the Geological Survey of Sweden, <https://www.sgu.se/en/products/customer-services>).

| Rock type            | N (Sweref99) | E<br>(Sweref 99) | Quartz<br>content,<br>% | Thermal<br>conductivity,<br>W/mK |
|----------------------|--------------|------------------|-------------------------|----------------------------------|
| Felsic metavolcanite | 6475028      | 544182           | 33                      | 3.7                              |
| Felsic metavolcanite | 6481399      | 541699           | 25                      | 3.2                              |
| Felsic metavolcanite | 6477806      | 543740           | 24                      | 3.2                              |
| Felsic metavolcanite | 6477806      | 543745           | 21                      | 3                                |
| Felsic metavolcanite | 6477822      | 544586           | 19                      | 3.5                              |
| Felsic metavolcanite | 6481948      | 543059           | 15                      | 2.7                              |
| Gneiss               | 6482788      | 541826           | 36                      | 3.6                              |
| Gneiss               | 6478039      | 543987           | 33                      | 3.5                              |
| Granite              | 6483774      | 545183           | 20                      | 2.8                              |
| Granite              | 6480878      | 543168           | 19                      | 2.9                              |
| Granite              | 6477028      | 534526           | 34.5                    | 3.6                              |
| Granite              | 6478703      | 543056           | 34.5                    | 3.5                              |
| Granite              | 6475398      | 544933           | 33.5                    | 3.4                              |
| Granite              | 6476981      | 537010           | 31.5                    | 3.4                              |
| Granite              | 6476668      | 539874           | 30.5                    | 3.4                              |
| Granite              | 6477289      | 537607           | 29.5                    | 3.4                              |
| Granite              | 6480472      | 540860           | 29                      | 3.6                              |
| Granite              | 6481564      | 543951           | 28                      | 3.3                              |
| Granite              | 6477506      | 545672           | 28                      | 3.6                              |
| Granite              | 6475734      | 544208           | 27                      | 3.2                              |
| Granite              | 6481014      | 545540           | 27                      | 3.3                              |
| Granite              | 6479227      | 537256           | 26                      | 3.2                              |
| Granite              | 6482119      | 542697           | 25                      | 3.1                              |
| Monzogranite         | 6479620      | 543665           | 34                      | 3.6                              |
| Metamafic rock       | 6483201      | 540824           | 4                       | 2.4                              |
| Metamafic rock       | 6478553      | 540831           | 2                       | 2.4                              |
| Metamafic rock       | 6478548      | 540831           | 1                       | 2.5                              |
| Metamafic rock       | 6477355      | 541457           | <1                      | 2.6                              |
| Metamafic rock       | 6478708      | 541880           | <1                      | 2.6                              |
| Metamafic rock       | 6476461      | 542416           | <1                      | 2.6                              |
| Metamafic rock       | 6478718      | 541880           | <1                      | 2.8                              |
| Metamafic rock       | 6476970      | 542258           | <1                      | 2.7                              |
| Monzodiorite         | 6481703      | 544645           | 14                      | 2.8                              |
| Monzodiorite         | 6480975      | 545156           | 8                       | 2.6                              |
| Monzodiorite         | 6480569      | 545150           | 8                       | 2.7                              |

**Table S4.** Individual measurements from the gamma spectrometer for the different rock types in the Distorp area. The sampling locations are given in the SWEREF99 TM coordinate system.

| Observation name | Measurement number | Potassium (%) | Uranium (ppm) | Thorium (ppm) | X (m) SWEREF99 TM | Y (m) SWEREF99 TM | Rock type    |
|------------------|--------------------|---------------|---------------|---------------|-------------------|-------------------|--------------|
| DSR200001        | 1                  | 3.7           | 14.4          | 26.1          | 539672            | 6479045           | Granite      |
| DSR200001        | 2                  | 4.4           | 13.7          | 19.2          | 539672            | 6479045           | Granite      |
| DSR200001        | 3                  | 4.3           | 11.1          | 22.1          | 539672            | 6479045           | Granite      |
| DSR200002        | 1                  | 4.1           | 5.6           | 13.2          | 539727            | 6478692           | Granite      |
| DSR200002        | 2                  | 3.9           | 6.2           | 11.3          | 539727            | 6478692           | Granite      |
| DSR200002        | 3                  | 3.7           | 9.0           | 14.8          | 539727            | 6478692           | Granite      |
| DSR200003        | 1                  | 4.0           | 10.6          | 19.0          | 539722            | 6478327           | Granite      |
| DSR200003        | 2                  | 3.6           | 11.0          | 20.3          | 539722            | 6478327           | Granite      |
| DSR200003        | 3                  | 3.8           | 6.7           | 19.9          | 539722            | 6478327           | Granite      |
| DSR200004        | 1                  | 3.3           | 2.6           | 12.0          | 539160            | 6478523           | Granite      |
| DSR200004        | 2                  | 3.5           | 4.6           | 11.5          | 539160            | 6478523           | Granite      |
| DSR200004        | 3                  | 3.1           | 3.2           | 12.7          | 539160            | 6478523           | Granite      |
| DSR200005        | 1                  | 2.0           | 2.7           | 4.0           | 539760            | 6478200           | Gabbro       |
| DSR200005        | 2                  | 1.7           | 1.8           | 4.5           | 539760            | 6478200           | Gabbro       |
| DSR200005        | 3                  | 2.4           | 0.9           | 3.5           | 539760            | 6478200           | Gabbro       |
| DSR200006        | 1                  | 4.7           | 2.1           | 19.4          | 538806            | 6478144           | Granite      |
| DSR200006        | 2                  | 4.5           | 8.0           | 18.6          | 538806            | 6478144           | Granite      |
| DSR200006        | 3                  | 4.6           | 6.9           | 22.8          | 538806            | 6478144           | Granite      |
| DSR200006        | 1                  | 2.1           | 3.4           | 8.7           | 538806            | 6478144           | Granodiorite |
| DSR200006        | 2                  | 1.9           | 3.5           | 8.2           | 538806            | 6478144           | Granodiorite |
| DSR200006        | 3                  | 3.4           | 3.4           | 8.5           | 538806            | 6478144           | Granodiorite |
| DSR200007        | 1                  | 5.7           | 7.4           | 37.9          | 537100            | 6479320           | Granite      |
| DSR200007        | 2                  | 6.6           | 11.7          | 40.8          | 537100            | 6479320           | Granite      |
| DSR200007        | 3                  | 4.5           | 4.8           | 24.2          | 537100            | 6479320           | Granite      |
| DSR200008        | 1                  | 3.0           | 2.8           | 15.5          | 537002            | 6479953           | Granite      |
| DSR200008        | 2                  | 2.5           | 2.7           | 9.5           | 537002            | 6479953           | Granite      |
| DSR200008        | 3                  | 2.3           | 3.3           | 9.9           | 537002            | 6479953           | Granite      |
